# Supplementary material for: ATR-FTIR spectroscopy and spectroscopic imaging to investigate the behaviour of proteins subjected to freeze–thaw cycles in droplets, wells, and under flow
Source: Royal Society of Chemistry journal article supplement (doi:10.1039/d1an00087j), 2021-01-01
Supplement: d1an00087j1.pdf [file d1an00087j1.pdf]

## Supplementary Information

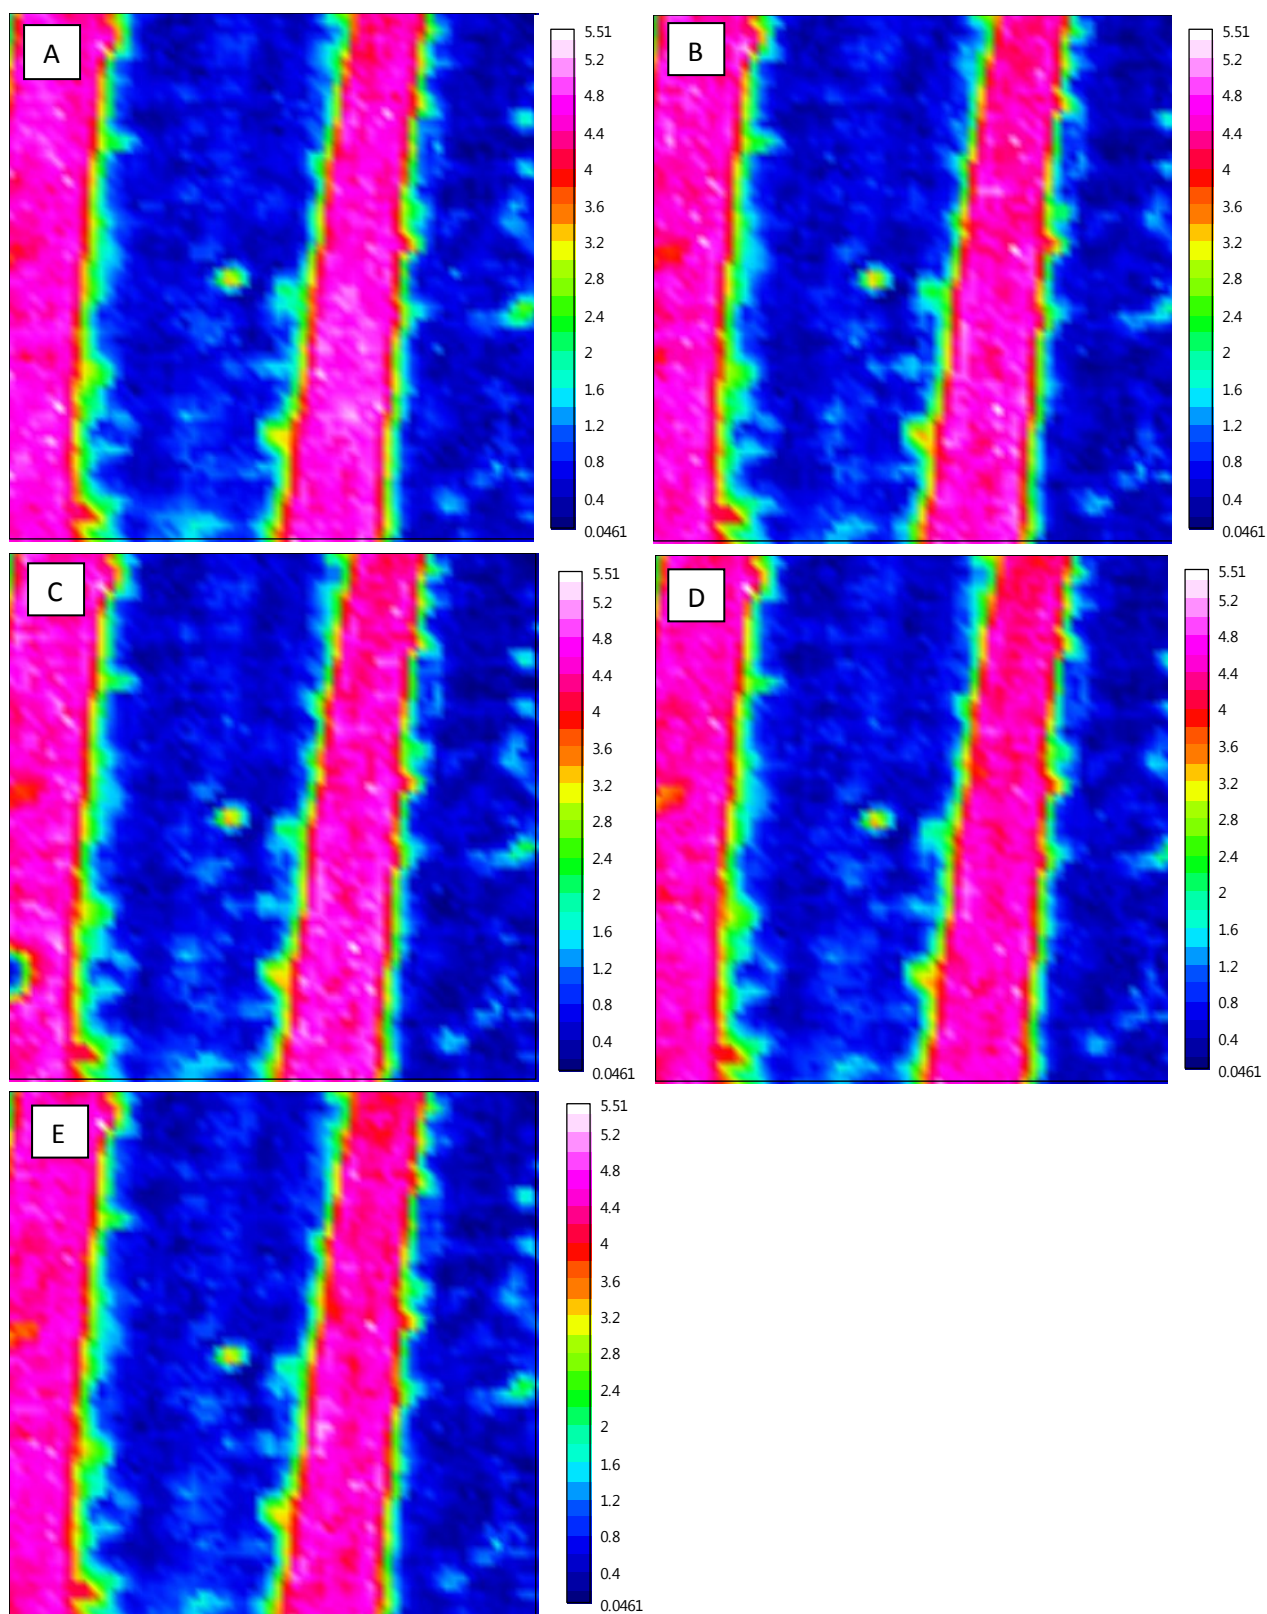

**Supplementary Figure 1.** Integrated absorbance of the amide I band showing 30 mg/ml lysozyme in channels under flow for FTC 1 (A) to 5 (E)
